# Supplementary material for: In situ surface/interface generation on Cu2O nanostructures toward enhanced electrocatalytic CO2 reduction to ethylene using operando spectroscopy
Source: Royal Society of Chemistry journal article supplement (doi:10.1039/d2qi01977a), 2022-11-11
Supplement: d2qi01977a1.pdf [file d2qi01977a1.pdf]

## Supporting information

### In situ surface/interface generation on $\text{Cu}_2\text{O}$ nanostructures toward enhanced electrocatalytic $\text{CO}_2$ to ethylene using operando spectroscopy

Fangfang Chang<sup>1</sup>, Yongpeng Liu<sup>1</sup>, Juncai Wei<sup>1</sup>, Lin Yang<sup>1</sup>, and Zhengyu Bai\*<sup>1</sup>

*Collaborative Innovation Center of Henan Province for Green Manufacturing of Fine Chemicals, Key Laboratory of Green Chemical Media and Reactions, Ministry of Education, School of Chemistry and Chemical Engineering, Henan Normal University, Xinxiang, Henan 453007, China. Email: [baizhengyu2000@163.com](mailto:baizhengyu2000@163.com)*

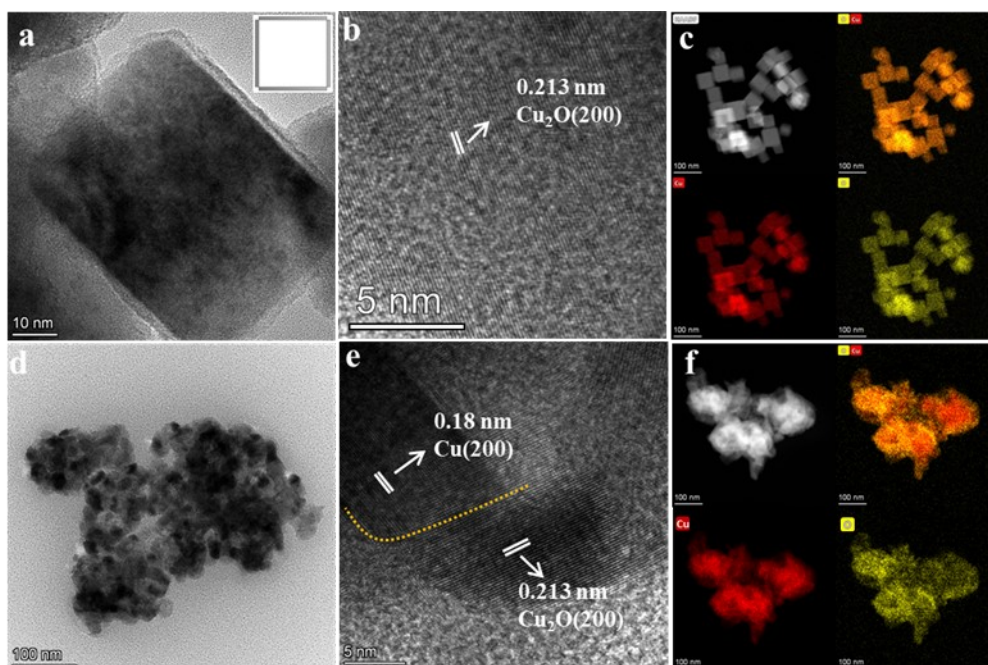

**Fig. S1.** (a) TEM images, (b) HR-TEM, (c) EDS-elemental mapping images of as-synthesized F-Cu<sub>2</sub>O catalyst, and (d) TEM images, (e) HR-TEM, (f) EDS-elemental mapping images (Cu species were in red, and O species were in yellow) of surface reconstructed F-Cu<sub>2</sub>O samples after reduction at -1.1 V vs. RHE.

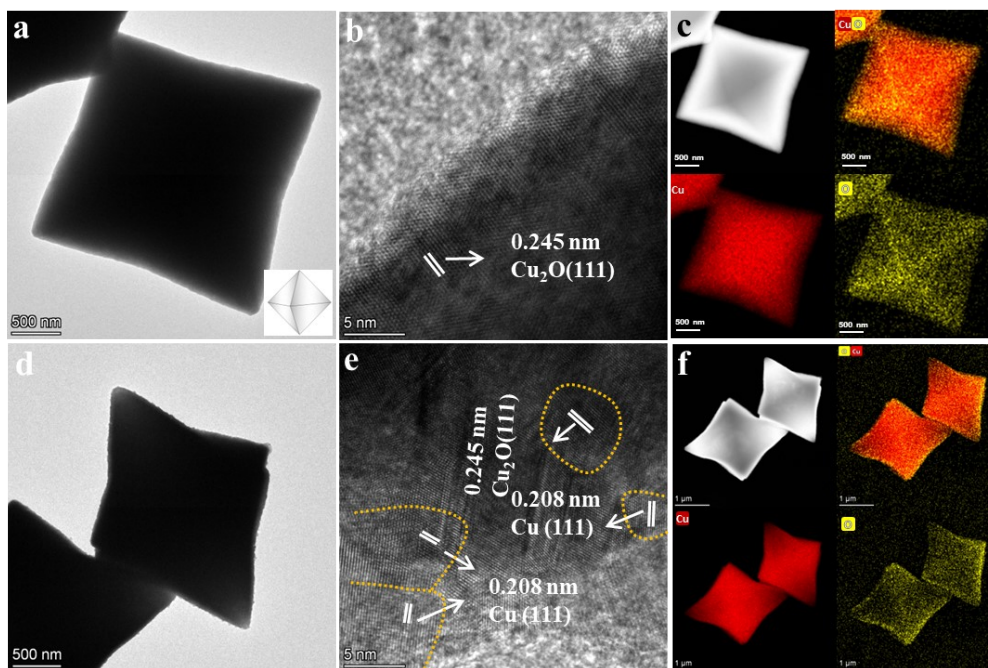

**Fig. S2.** (a) TEM images, (b) HR-TEM, (c) EDS-elemental mapping images of as-synthesized O-Cu<sub>2</sub>O catalyst, and (d) TEM images, (e) HR-TEM, (f) EDS-elemental mapping images (Cu species were in red, and O species were in yellow) of surface reconstructed O-Cu<sub>2</sub>O samples after reduction at -1.1 V vs. RHE.

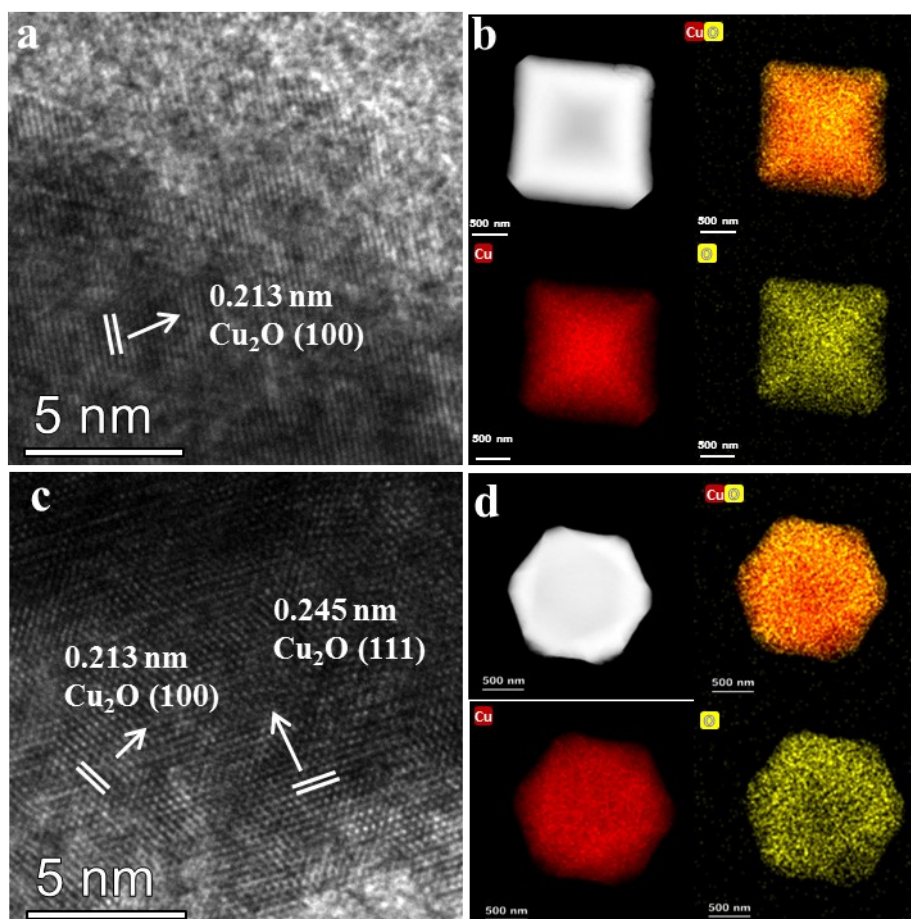

**Fig. S3.** HR-TEM (a, c) and EDS-elemental mapping images (b, and d, Cu species were in red, and O species were in yellow) of the square regions of T-Cu<sub>2</sub>O viewed along the (a) [100], (d) [111] directions.

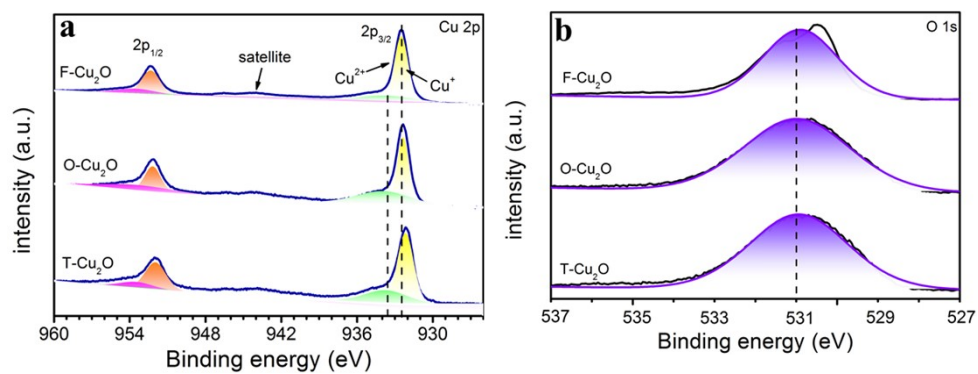

Fig. S4. XPS spectra for (a) Cu 2p, (b) O 1s of the three Cu<sub>2</sub>O catalysts before CO<sub>2</sub>RR.

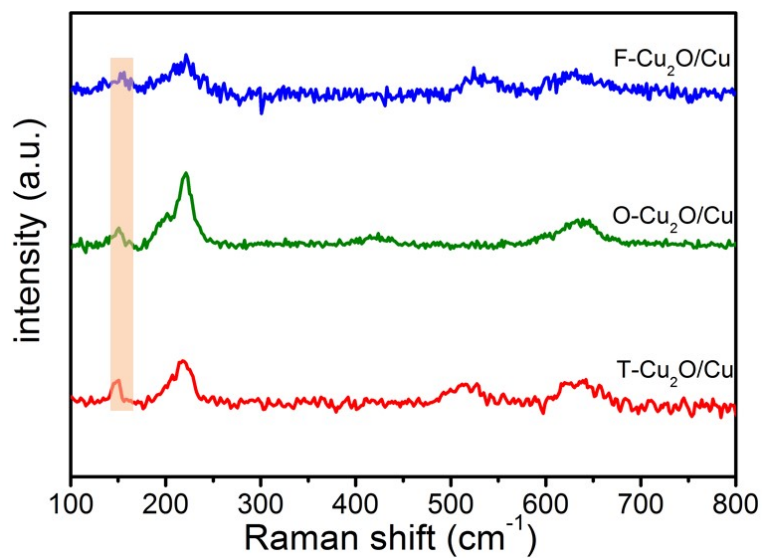

Fig. S5. Raman spectra of the three Cu<sub>2</sub>O catalysts after reconstruction.

**Table S1.** The content of Cu<sup>+</sup> and Cu<sup>0</sup> on the surface of the Cu<sub>2</sub>O samples after CO<sub>2</sub>RR obtained by XPS

| Catalysts              | Copper species (wt %) |                 |                                  |
|------------------------|-----------------------|-----------------|----------------------------------|
|                        | Cu <sup>+</sup>       | Cu <sup>0</sup> | Cu <sup>+</sup> /Cu <sup>0</sup> |
| F-Cu <sub>2</sub> O/Cu | 41.6                  | 58.4            | 0.71                             |
| O-Cu <sub>2</sub> O/Cu | 36.9                  | 63.1            | 0.58                             |
| T-Cu <sub>2</sub> O/Cu | 61.6                  | 38.4            | 1.60                             |

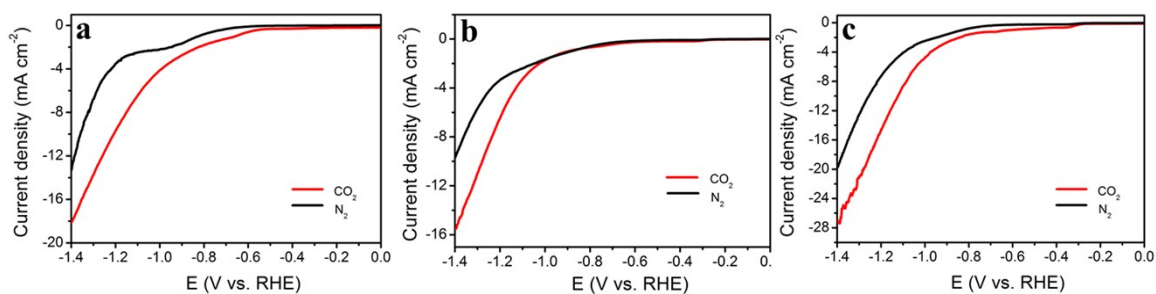

**Fig. S6.** LSV curves of F-Cu<sub>2</sub>O/Cu (a), O-Cu<sub>2</sub>O/Cu (b) and T-Cu<sub>2</sub>O/Cu (c) catalysts in 0.1 M KHCO<sub>3</sub> with saturated N<sub>2</sub> (black line) and CO<sub>2</sub> (red line), respectively, at a 20 mV s<sup>-1</sup> scan rate.

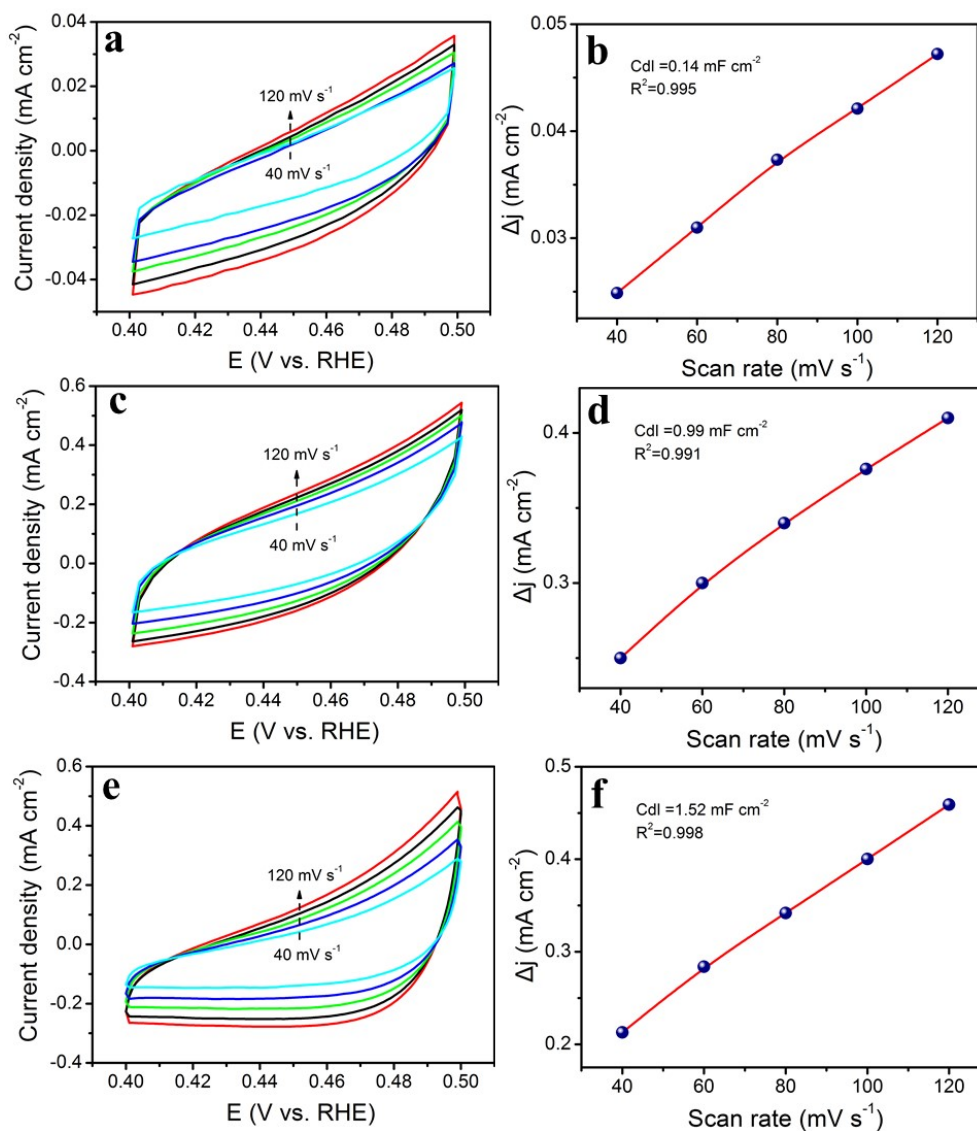

**Fig. S7.** Electrochemical surface area (ECSA) measurement. CVs with various scan rates between 0.4 - 0.5 V vs. RHE in CO<sub>2</sub>-saturated 0.1 M KHCO<sub>3</sub> solution for determining the double-layer capacitance (Cdl) for (a) F-Cu<sub>2</sub>O/Cu, (c) O-Cu<sub>2</sub>O/Cu and (e) T-Cu<sub>2</sub>O/Cu; double layer capacitance of (b) F-Cu<sub>2</sub>O/Cu, (d) O-Cu<sub>2</sub>O/Cu and (f) T-Cu<sub>2</sub>O/Cu.

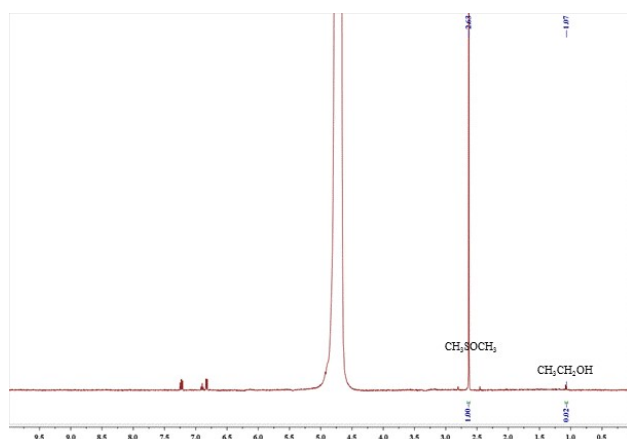

Fig. S8.  $^1\text{H}$  NMR spectrum of the electrolytes after  $\text{CO}_2$  reduction.

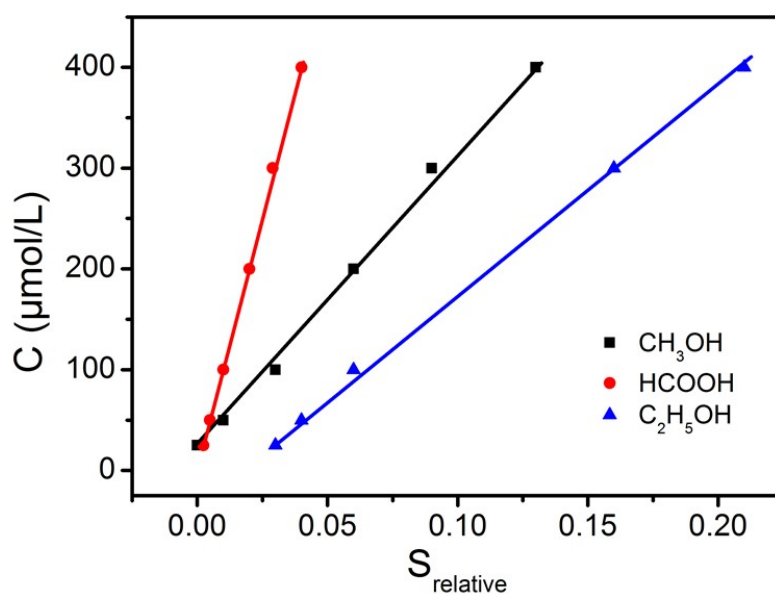

Fig. S9. The standard curves of the  $\text{CO}_2\text{RR}$  products. The relative peak area ( $S_{\text{relative}}$ ) is the ratio of the reduction product peak area to the DMSO peak area.

Table S2. The linear fitting analytic expressions and variances of the standard curves.

| Expression | $C = a + b \times S_{\text{relative}}$ |                        |                |
|------------|----------------------------------------|------------------------|----------------|
| Products   | $\text{CH}_3\text{CH}_2\text{OH}$      | $\text{CH}_3\text{OH}$ | $\text{HCOOH}$ |
| Intercept  | -27.23                                 | 21.01                  | 0.35           |
| Slope      | 2063.95                                | 2965.42                | 10086.6        |
| R-Square   | 0.993                                  | 0.996                  | 0.999          |

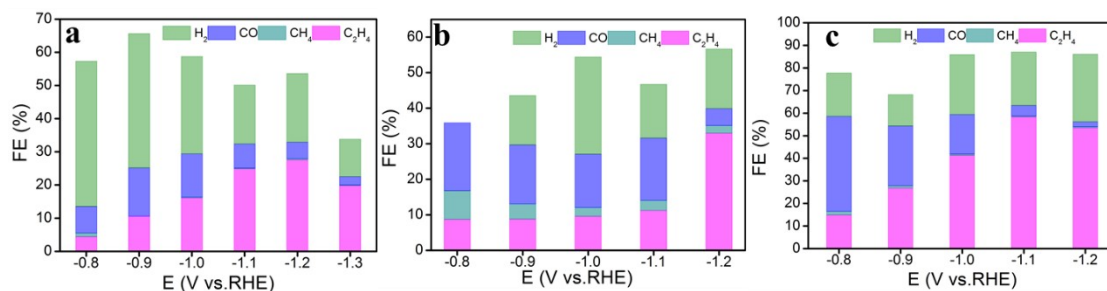

**Fig. S10.** Faradaic efficiencies for C<sub>2</sub>H<sub>4</sub>, CO, CH<sub>4</sub> and H<sub>2</sub> on (a) F-Cu<sub>2</sub>O/Cu, (b) O-Cu<sub>2</sub>O/Cu and (c) T-Cu<sub>2</sub>O/Cu catalysts at different applied potentials.

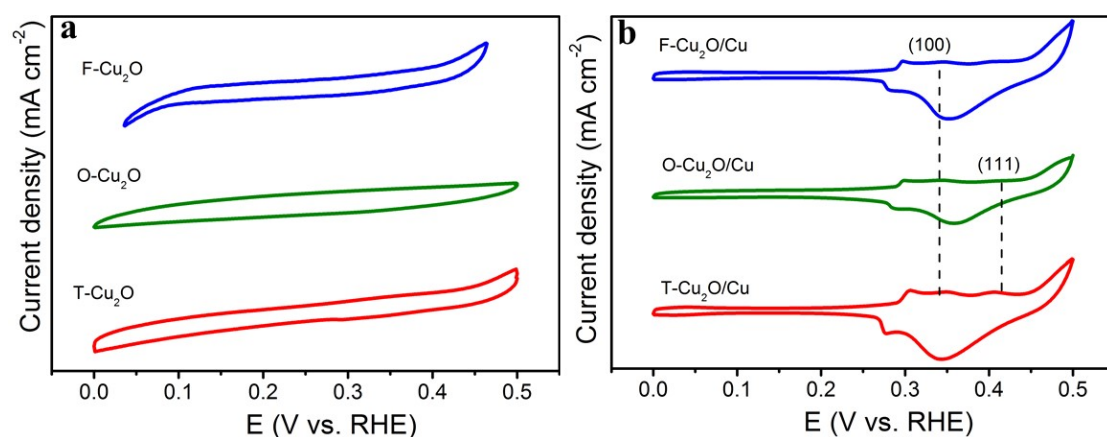

**Fig. S11.** CV curves collected in N<sub>2</sub>-saturated 1 M KOH for (a) before and (b) after reconstruction Cu<sub>2</sub>O catalysts

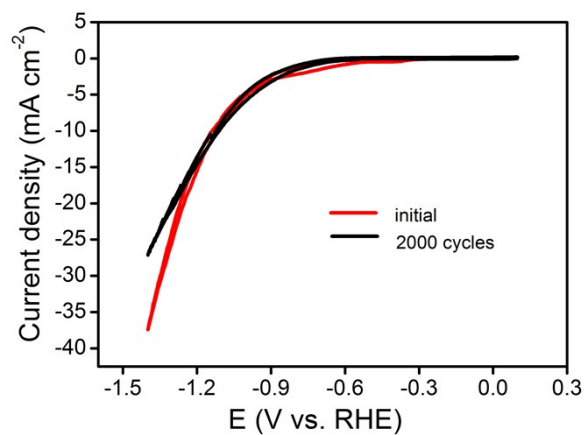

**Fig. S12.** CV curves for T-Cu<sub>2</sub>O/Cu before and after 2000 potential cycles in 0.1 M KHCO<sub>3</sub> solution saturated with CO<sub>2</sub> (sweep rate, 50mV/s, potential cycle window: -1.4 and 0 V vs. RHE)

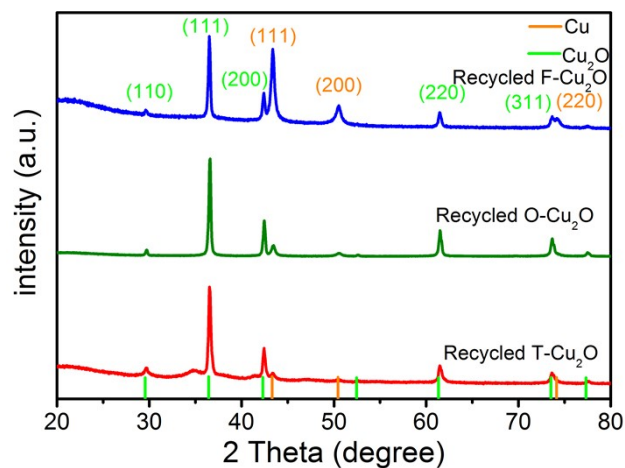

Fig. S13. PXRD patterns of the  $\text{Cu}_2\text{O}$  catalysts after CV- Recycled.

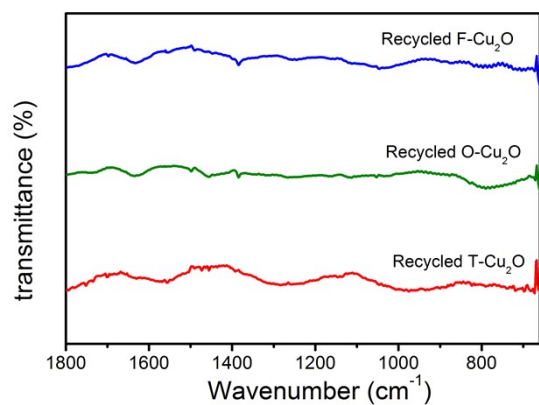

Fig. S14. IR spectroscopy of the  $\text{Cu}_2\text{O}$  catalysts after CV- Recycled

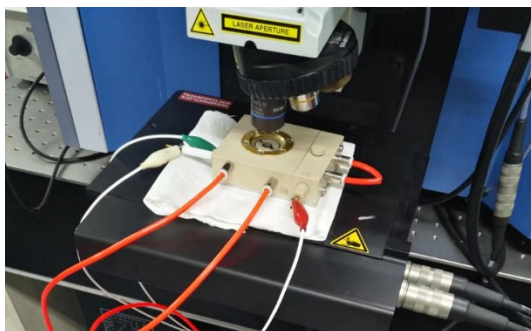

Fig. S15. The experimental set up for the in situ Raman spectroscopy measurement.

**Table S3.** Catalytic performances of Cu-based catalysts

| Catalyst                            | substrate    | Electrolyte                          | FE <sub>(C<sub>2</sub>H<sub>4</sub>)</sub> | E vs. RHE | Ref.             |
|-------------------------------------|--------------|--------------------------------------|--------------------------------------------|-----------|------------------|
| Cu deposited on Cu <sub>3</sub> N   | glassy       | 0.1 M                                | 39%                                        | -0.95 V   | 1                |
|                                     | carbon       | KHCO <sub>3</sub>                    |                                            |           |                  |
| Cu nanocubes (44 nm)                | glassy       | 0.1 M                                | 41.1%                                      | -1.1 V    | 2                |
|                                     | carbon       | KHCO <sub>3</sub>                    |                                            |           |                  |
| Fragmentation Cu <sub>2</sub> O NPs | glassy       | 0.1 M                                | 57.3%                                      | -1.1 V    | 3                |
|                                     | carbon       | KHCO <sub>3</sub>                    |                                            |           |                  |
| Boron-doped copper                  | glassy       | 0.1 M KCl                            | 52%                                        | -1.1 V    | 4                |
|                                     | carbon       |                                      |                                            |           |                  |
| F-modified Cu                       | GDL          | 0.75 M KOH                           | 65%                                        | -0.89 V   | 5                |
| Cu <sub>2</sub> O-derived Cu NPs    | Cu disc      | 0.1 M                                | 32.1%                                      | -1.0 V    | 6                |
|                                     |              | KHCO <sub>3</sub>                    |                                            |           |                  |
| Dealloyed Cu–Al                     | C-GDL        | 1 M KOH                              | 80%                                        | -1.5 V    | 7                |
| Cu <sub>4.16</sub> CeO <sub>x</sub> | glassy       | 0.1 M                                | 47.6%                                      | -1.1 V    | 8                |
|                                     | carbon       | KHCO <sub>3</sub>                    |                                            |           |                  |
| Hierarchical CuO microboxes         | carbon paper | 0.1 M K <sub>2</sub> SO <sub>4</sub> | 51.3%                                      | -1.05 V   | 9                |
| T-Cu <sub>2</sub> O                 | glassy       | 0.1 M                                | 58.0%                                      | -1.1 V    | <b>This work</b> |
|                                     | carbon       | KHCO <sub>3</sub>                    |                                            |           |                  |

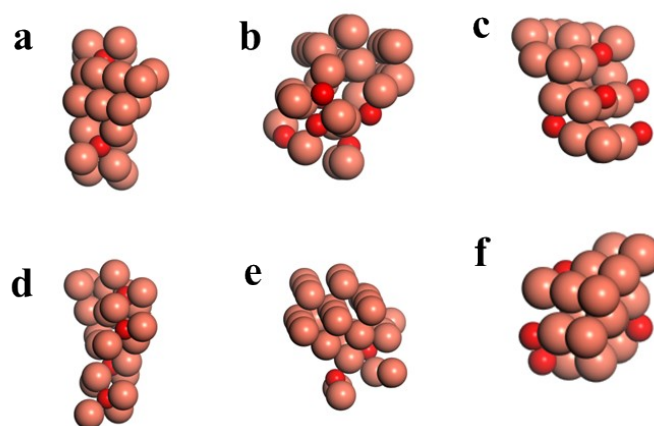**Fig. S15.** DFT models of (a and d) F-Cu<sub>2</sub>O/Cu(100), (b and e) O-Cu<sub>2</sub>O/Cu(111) and T-Cu<sub>2</sub>O/Cu(111)/(100) interfaces with different view angles.

## Reference

- 1 Z. Liang, T. Zhuang, A. Seifitokaldani, J. Li, C. Huang, C. Tan, Y. Li, P. De Luna, C. T. Dinh, Y. Hu, Q. Xiao, P. Hsieh, Y. Wang, F. Li, R. Quintero-Bermudez, Y. Zhou, P. Chen, Y. Pang, S. Lo, L. J. Chen, H. Tan, Z. Xu, S. Zhao, D. Sinton, E. Sargent, Copper-on-nitride enhances the stable electrosynthesis of multi-carbon products from CO<sub>2</sub>, *Nat. Commun.*, 2018, **9**, 3828.
- 2 A. Loiudice, P. Lobaccaro, E. A. Kamali, T. Thao, B.H. Huang, J. W. Ager, R. Buonsanti, Tailoring copper nanocrystals towards C<sub>2</sub> products in electrochemical CO<sub>2</sub> reduction, *Angew. Chem. Int. Ed.*, 2016, **55**, 5789–5792.



- 3 H. Jung, S.Y. Lee, C.W. Lee, M.K. Cho, D.H. Won, C. Kim, H. S. Oh, B. K. Min, Y. J. Hwang, Electrochemical fragmentation of Cu<sub>2</sub>O nanoparticles enhancing selective C-C coupling from CO<sub>2</sub> reduction reaction, *J. Am. Chem. Soc.*, 2019, **141**, 4624–4633.
- 4 Y. Zhou, F. Che, M. Liu, C. Zou, Z. Liang, P. De Luna, H. Yuan, J. Li, Z. Wang, H. Xie, H. Li, P. Chen, E. Bladt, R. Quintero-Bermudez, T. Sham, S. Bals, J. Hofkens, D. Sinton, G. Chen, E. Sargent, Dopant-induced electron localization drives CO<sub>2</sub> reduction to C<sub>2</sub> hydrocarbons, *Nat. Chem.*, 2018, **10**, 974-980.
- 5 W. Ma, S. Xie, T. Liu, Q. Fan, J. Ye, F. Sun, Z. Jiang, Q. Zhang, J. Cheng, Y. Wang, Electrocatalytic reduction of CO<sub>2</sub> to ethylene and ethanol through hydrogen-assisted C–C coupling over fluorine-modified copper, *Nat. Catal.*, 2020, **3**, 478.
- 6 C. S. Chen, J. H. Wan, B. S. Yeo, Electrochemical reduction of carbon dioxide to ethane using nanostructured Cu<sub>2</sub>O-derived copper catalyst and palladium (II) chloride, *J. Phys. Chem. C*, 2015, **119**, 26875–26882.
- 7 M. Zhong, K. Tran, Y. Min, C. Wang, Z. Wang, C. T. Dinh, P. De Luna, Z. Yu, A. S. Rasouli, P. Brodersen, S. Sun, O. Voznyy, C. S. Tan, M. Askerka, F. Che, M. Liu, A. Seifitokaldani, Y. Pang, S.C. Lo, A. Ip, Z. Ulissi, E. H. Sargent, Accelerated discovery of CO<sub>2</sub> electrocatalysts using active machine learning. *Nature*, 2020, **581**, 178.
- 8 D. Wu, C. Dong, D. Wu, J. Fu, H. Liu, S. Hu, Z. Jiang, S. Qiao, X. Du, Cuprous ions embedded in ceria lattice for selective and stable electrochemical reduction of carbon dioxide to ethylene, *J. Mater. Chem. A*, 2018, **6**, 9373-9377.
- 9 D. Tan, J. Zhang, L. Yao, X. Tan, X. Cheng, Q. Wan, B. Han, L. Zheng, J. Zhang, Multi-shelled CuO microboxes for carbon dioxide reduction to ethylene, *Nano Res.*, 2020, **13**, 768–774.
